# Supplementary material for: A draft Arab pangenome reference
Source: Research Square preprint supplement (doi:10.21203/rs.3.rs-3490341/v1), 2023-10-26
Supplement: Supplementary file 1 [file f641fda3b6e326dbb5076479.pdf]

# SUPPLEMENTARY INFORMATION

## A Draft Arab Pangenome Reference

Correspondence and requests for materials should be addressed to Mohammed Uddin ([mohammed.uddin@mbru.ac.ae](mailto:mohammed.uddin@mbru.ac.ae)) or Alawi Alsheikh-Ali ([alawi.alsheikhali@mbru.ac.ae](mailto:alawi.alsheikhali@mbru.ac.ae))

## Contents

|                                                              |           |
|--------------------------------------------------------------|-----------|
| <b>SUPPLEMENTARY METHODS</b>                                 | <b>3</b>  |
| <b>1. APR cohort and sample phenotype information</b>        | <b>3</b>  |
| <b>2. Pacific Bioscience High Fidelity (HiFi) Sequencing</b> | <b>3</b>  |
| a. DNA quality control                                       | 3         |
| b. DNA shearing and cleanup                                  | 3         |
| c. Repair and A-tailing                                      | 4         |
| d. Adapter ligation                                          | 4         |
| e. Cleanup                                                   | 4         |
| f. Nuclease treatment                                        | 5         |
| g. AMPure PB bead size selection                             | 5         |
| h. Binding, washing, and eluting                             | 5         |
| i. ABC Steps                                                 | 5         |
| A. Annealing Sequencing primer                               | 6         |
| B. Sequencing polymerase                                     | 6         |
| C. Purification of Polymerase bound SMRTbell complexes       | 6         |
| D. Sequencing control dilution                               | 6         |
| E. Loading dilution                                          | 6         |
| <b>3. Nanopore ultra-long sequencing</b>                     | <b>7</b>  |
| a. PBMC isolation from frozen blood                          | 7         |
| b. DNA extraction                                            | 7         |
| c. DNA Tagmentation                                          | 8         |
| d. Adapter attachment                                        | 8         |
| e. Clean-up                                                  | 8         |
| f. Flow cell loading and sequencing                          | 9         |
| <b>4. <i>de novo</i> genome assembly</b>                     | <b>9</b>  |
| <b>5. Genome assembly polishing</b>                          | <b>10</b> |
| <b>6. Assembly quality assessment</b>                        | <b>10</b> |

|                                                                                                                        |           |
|------------------------------------------------------------------------------------------------------------------------|-----------|
| <b>7. Evaluation of short read and long read whole genome mapping to APR graph</b>                                     | <b>11</b> |
| <b>SUPPLEMENTARY FIGURES</b>                                                                                           | <b>12</b> |
| Supplementary Figure 1: APR long read sequencing coverage.                                                             | 12        |
| Supplementary Figure 2: Coverage of chromosomes from APR cohort.                                                       | 13        |
| Supplementary Figure 3: APR SNV variant distribution from HiFi data in comparison with 1000 genomes.                   | 14        |
| Supplementary Figure 4: Indel comparison with 1000 genomes.                                                            | 15        |
|                                                                                                                        | 16        |
| Supplementary Figure 5: Principal Component Analysis scatter plot.                                                     | 16        |
| Supplementary Figure 6: Visualization of interchromosomal misjoins in APR assemblies.                                  | 17        |
| Supplementary Figure 7: Contig length distribution.                                                                    | 18        |
| Supplementary Figure 8: Distribution of misassembled contigs identified as inversions and translocations.              | 19        |
| Supplementary Figure 9: Aligned and unaligned contigs.                                                                 | 20        |
| Supplementary Figure 10: Pangenome graph characteristics.                                                              | 21        |
| Supplementary Figure 11: Novel sequences with respect to T2T-CHM13 identified in the APR assemblies.                   | 22        |
| Supplementary Figure 12: Visualizing complex pangenome loci.                                                           | 24        |
| Supplementary Figure 13: Visualizing complex pangenome loci.                                                           | 24        |
| Supplementary Figure 14: Mitochondrial read distribution.                                                              | 25        |
| <b>SUPPLEMENTARY TABLES</b>                                                                                            | <b>26</b> |
| Supplementary Table 1 - Phenotypic details of APR samples.                                                             | 26        |
| Supplementary Table 3 - Sample-wise ultra long read (>100kb) count and coverage.                                       | 28        |
| Supplementary Table 7 - Contiguity of Verkko and Hifiasm assemblies.                                                   | 30        |
| Supplementary Table 8 - Mitochondrial contigs obtained for each sample by mapping to chrM.                             | 30        |
| Supplementary Table 15: Pan ethnic disease autosomal recessive of X-linked genes within APR specific duplicated genes. | 34        |

|                                                                                                                      |           |
|----------------------------------------------------------------------------------------------------------------------|-----------|
| <b>Supplementary Table 17. Comparison on size of APR HPRC graph reference and HPRC, CPC and APR graph reference.</b> | <b>35</b> |
| <b>Supplementary Table 23. Repeat elements within APR specific novel sequences.</b>                                  | <b>35</b> |
| <b>Supplementary Table 28 - Structural haplotypes present in APR, HPRC+CPC</b>                                       | <b>36</b> |
| <b>REFERENCES</b>                                                                                                    | <b>38</b> |

## **Supplementary Methods**

### **1. APR cohort and sample phenotype information**

We have recruited all samples from different outpatient clinics within Dubai Academic Healthcare Corporation (DAHC). The trio were recruited from Al Jalila Children's Hospital, Dubai, UAE. The unrelated 40 Emirati individuals were recruited from DAHC healthcare facilities who were clinically assessed for multiple years by family physicians and identified as healthy. For all adult healthy 40 samples, we have obtained multiyear clinical health records to identify various physiological parameters and their distribution. The project research genetic counselor independently interviewed regarding the absence and presence of most of the common chronic conditions.

### **2. Pacific Bioscience High Fidelity (HiFi) Sequencing**

We constructed whole genome sequencing (WGS) libraries using the long-read PacBio SMRTbell prep kit 3.0 protocol (102-166-600) as detailed below.

#### **a. DNA quality control**

To evaluate and ensure suitable quality and size of DNA for the use of this protocol, we began by homogenizing the DNA in the solution by pulse vortexing and gently pipetting our samples. Quick spinning the samples, we took 1  $\mu$ L aliquot from each sample and diluted them with 9  $\mu$ L of elution buffer or water. Next we measured the DNA concentration using the 1X dsDNA HS kit and the Qubit fluorometer. Each aliquot was diluted in Tape Station dilution buffer to a total concentration of 250 pg/ $\mu$ L, based on the Qubit readings. DNA size was measured using the Femto Pulse system and the gDNA 165Kb analysis kit.

#### **b. DNA shearing and cleanup**

Low TE buffer was added to bring the volume of DNA samples to 130  $\mu$ L, with a target concentration of 30 ng/ $\mu$ L. The DNA was sheared on the Megaruptor 3 system as per the

recommended settings. Sheared DNA was transferred into a tube, and 1 X v/v of resuspended, room-temperature SMRTbell cleanup beads were added. The beads were pipette mixed until evenly distributed. Tubes were then quick-spinned and incubated at room temperature for 10 min. After incubation, tubes were placed in a magnetic separation rack to allow the beads to separate fully and the supernatant was discarded. The beads were slowly covered by adding 200  $\mu$ L of fresh 80% ethanol. After 30 seconds, the ethanol was discarded, and the step was repeated.

To remove the residual ethanol, the tubes were removed from the magnetic rack, spun, placed again in the rack until the beads separated, and the remaining solution was aspirated. Immediately after removing the tubes from the magnetic rack, 47  $\mu$ L of low TE buffer were added to the tubes and the beads were resuspended by pipetting 10 times. The tubes were quick-spinned and incubated at room temperature for 5 min for DNA elution. Next, the tubes were placed again in the magnetic rack, beads separated, and the supernatant transferred to a new tube. To verify sample quality per its concentration and size distribution, we aliquoted 1  $\mu$ L from each sample and diluted with 9  $\mu$ L elution buffer or water. Next, the Qubit fluorometer was used to measure DNA concentration using the 1X dsDNA HS kit. Each aliquot was diluted to 250 pg/ $\mu$ L in Tape Station dilution buffer and DNA size was measured using the Tape Station system.

#### **c. Repair and A-tailing**

Into a centrifuge tube, we created reaction mix 1 by adding repair buffer (35.2  $\mu$ L for 4 libraries, 80  $\mu$ L for 8 libraries), end repair mix (17.6  $\mu$ L for 4 libraries, 40  $\mu$ L for 8 libraries), and DNA repair mix (8.8  $\mu$ L for 4 libraries, 30  $\mu$ L for 8 libraries). After pipetting and spinning the reaction mix, we added 14  $\mu$ L of reaction mix 1 to each of our samples, bringing the total reaction volume to 60  $\mu$ L. Then we pipetted and spinned our sample reactions, followed by running the repair and A-tailing thermocycling program, 37°C for 30 min, 65°C for 5 min, and a 4°C hold.

#### **d. Adapter ligation**

Since we barcoded our samples, we added 4  $\mu$ L of barcoded adapters from the SMRTbell barcoded adapter plate 3.0 to each sample. In a centrifuge tube, we created reaction mix 2 by adding ligation mix (132  $\mu$ L for 4 libraries, 300  $\mu$ L for 8 libraries), and ligation enhancer (4.4  $\mu$ L for 4 libraries, 10  $\mu$ L for 8 libraries). After pipetting and spinning the reaction mix, we added 31  $\mu$ L of reaction mix 2 to each of our samples, bringing the total reaction volume to 95  $\mu$ L. Then we pipetted and spinned our sample reactions, followed by running the adapter ligation thermocycling program, 20°C for 30 min and a 4°C hold.

#### **e. Cleanup**

95  $\mu$ L of resuspended SMRTbell cleanup beads were added to each sample and pipetted for even distribution. The tubes were spun and incubated at room temperature for 10 min. Tubes were then placed in a magnetic separation rack, when the beads separated from the solution the supernatant was discarded. The beads were slowly covered by adding 200  $\mu$ L of fresh 80%

ethanol. After 30 seconds, the ethanol was discarded, and the step was repeated. To remove the residual ethanol, the tubes were removed from the magnetic rack, spun, placed again in the rack until the beads separated, and the remaining solution was aspirated. Immediately after removing the tubes from the magnetic rack, 40  $\mu$ L of elution buffer were added to the tubes and the beads were resuspended. The tubes were quick-spun and incubated at room temperature for 5 min for DNA elution. Next, the tubes were placed again in the magnetic rack, beads separated, and the supernatant transferred to a new tube.

#### **f. Nuclease treatment**

In a centrifuge tube, we created reaction mix 3 by adding nuclease buffer (22  $\mu$ L for 4 libraries, 50  $\mu$ L for 8 libraries), and nuclease mix (22  $\mu$ L for 4 libraries, 50  $\mu$ L for 8 libraries). After pipetting and spinning the reaction mix, we added 10  $\mu$ L of reaction mix 3 to each of our samples, bringing the total reaction volume to 50  $\mu$ L. Then we pipetted and spinned our sample reactions, followed by running the nuclease treatment thermocycling program, 37°C for 15 min and a 4°C hold.

#### **g. AMPure PB bead size selection**

By adding 1.75 mL of resuspended AMPure PB beads to 3.25 mL of elution buffer, we made a 35% v/v dilution. Then we added 155  $\mu$ L (3.1 X v/v) of resuspended 35% AMPure PB beads to each of our samples.

#### **h. Binding, washing, and eluting**

The samples were pipette mixed and spun, then incubated at room temperature for 20 minutes. Tubes were then placed in a magnetic separation rack, when the beads separated from the solution the supernatant was discarded. The beads were slowly covered by adding 200  $\mu$ L of fresh 80% ethanol. After 30 seconds, the ethanol was discarded, and the step was repeated. To remove the residual ethanol, the tubes were removed from the magnetic rack, spun, placed again in the rack until the beads separated, and the remaining solution was aspirated. Immediately after removing the tubes from the magnetic rack, 15  $\mu$ L of elution buffer were added to the tubes and the beads were resuspended by pipetting 10 times. The tubes were quick-spun and incubated at room temperature for 5 min for DNA elution. Next, the tubes were placed again in the magnetic rack, beads separated, and the supernatant transferred to a new tube. From each tube, a 1  $\mu$ L aliquot is taken and diluted with 9  $\mu$ L of elution buffer or water. DNA concentration was measured using a Qubit fluorometer and the 1X dsDNA HS kit.

#### **i. ABC Steps**

After completing library preparation, we performed ABC sequencing preparation as per the (102-739-700) kit protocol, detailed below.

### **A. Annealing Sequencing primer**

Following the DNA quantification, we diluted our samples to a concentration of 30 ng/μL. In a new Lo-bind tube, we added 11 μL of sample, 5/5 μL of annealing buffer, and 5.5 μL of sequencing primer, bringing the total volume to 22 μL. After pipetting well, the tubes were incubated at room temperature for 15 min.

### **B. Sequencing polymerase**

We began by diluting 11.5 μL of sequencing polymerase in 563.5 μL of polymerase buffer in a new lo-bind tube, bringing the total volume to 575 μL diluted polymerase master mix to be used immediately. Next, for each of our samples, we added 22 μL annealed sample and 22 μL diluted polymerase, bringing the total volume to 44 μL. The tubes were then incubated at room temperature for 15 min.

### **C. Purification of Polymerase bound SMRTbell complexes**

SMRTbell cleanup beads and loading buffer were brought to room temperature. For each sample, 44 μL of Binding reaction and 56 μL of dilution buffer were added, bringing the total reaction to 100 μL. Next, 120 μL of SMRTbell cleanup beads were added to the samples, gently pipetted, and incubated at room temperature for 10 min. Tubes were then placed in a magnetic bead rack until the beads completely separated from the solution. The supernatant was discarded and the beads were immediately resuspended in 50 μL loading buffer and gently pipetted. For elution of the polymerase-bound complexes, the samples were incubated at room temperature for at least 5 min. Tubes were placed again on the magnetic rack until the beads separated. Then the eluted solution was transferred to new Lo-Bind tubes and placed on ice, protected from the light.

### **D. Sequencing control dilution**

The control underwent three dilution steps, producing a master mix that is enough for all our samples. In a new Lo-bind tube, 19 μL dilution buffer and 1 μL sequencing control were mixed by flicking the tube and pulse spinning, then kept on ice. This process was repeated again to achieve dilution 2. For the third and final dilution, 76 μL dilution buffer and 4 μL diluted sequencing control from the second dilution were mixed well by flicking and spinning, and kept on ice.

### **E. Loading dilution**

For each of the samples loaded on the Revio system, Revio Polymerase Kit was used (Serial Number: 102-739-700). We combined 50 μL of the prepared sample, 47 μL loading buffer, and 3 μL of the diluted sequencing control from the previous step, bringing the total volume to 100

μL. 95 μL of each sample were loaded per well. For samples loaded on Sequel, the starting library concentration was 40 ng/μL. Sample dilution and loading followed the same protocol but differed in concentrations dependent on the starting sample concentration.

### **3. Nanopore ultra-long sequencing**

We used Oxford Nanopore Technologies ultra-long read sequencing kit (SQK-ULK114) protocol. Each sample was aliquoted at the time of collection into 1.8 ml Cryovials and stored at -80°C. 3 aliquots of each sample was used for preparing ultra-long libraries generating about 50× coverage of unsheared sequencing from 3 PromethION flow cells (R10.4.1) and a N50 value of around 60 kb. We have used additional flow cells (see supplementary table 2) for samples that did not yield adequate data.

Ultra-long libraries were prepared using the protocol outlined below:

#### **a. PBMC isolation from frozen blood**

1.6 ml frozen blood was thawed in 3X volume of cold NEB RBC lysis buffer in a 15 ml Falcon tube. Tube was gently inverted 10 times and kept at 4°C for 5 minutes. The tube was centrifuged at 2000 X g at 4°C for 2 min, after which the supernatant was discarded. The pellet was resuspended in 1.6 ml 1X PBS buffer by gently flicking and pipetting. The above steps were repeated for a total of 3 washes with NEB RBC lysis buffer. The final pellet of around 60 million cells was resuspended in 40 μl of 1X PBS and carried forward for ultra-long DNA extraction.

#### **b. DNA extraction**

Resuspended cells in 40ul of PBS were transferred to a fresh 5 ml Lo-Bind Eppendorf tube. In a separate tube, 1.8 ml NEB Monarch tissue lysis buffer and 40ul of NEB Monarch Proteinase K was mixed, then added to the resuspended PBMCs in the Lo-Bind tube. The reaction was mixed by slow pipetting five times using a 1 ml wide-bore pipette tip and incubated at 56°C on a thermomixer for 10 min. 15ul of NEB Monarch RNase A was added to the reaction and mixed by slow pipetting five times using a 1 ml wide-bore pipette tip. The reaction was incubated at 56°C on a thermomixer for 10 min at 650 rpm. Next, 900 μl of NEB Monarch protein separation solution was added to the reaction and the tube was placed in a Hula mixer for 10 mins at 3 rpm. The 5 ml tubes were then centrifuged for phase separation at 16,000 X g at 4°C for 10 min. Upper phase containing ultra-long DNA fragments was carefully collected into a fresh 5 ml Lo-Bind Eppendorf tube using a 1 ml wide-bore pipette tip. To this, 3 glass beads were added along with 2.5 ml isopropanol. The tube was placed in a Hula mixer for 20 mins at 3 rpm.

The ultra-long DNA fragments were precipitated around the 2 glass beads by the end of the incubation. The supernatant was discarded and the glass beads were washed two times using 2ml

NEB Monarch wash buffer per wash. The glass beads were then introduced to a Monarch bead retainer inserted into a Monarch collection tube, and centrifuged at 1000 X g for 1 minute to remove any remaining wash buffer. The glass beads were immediately moved into a fresh 2 ml Lo-Bind Eppendorf tube containing 560 µl of ONT extraction elution buffer. The tube was incubated at 56°C for 10 min. The beads and the elution buffer were introduced into a clean bead retainer inserted into a Monarch collection tube, and centrifuged at 1000 X g for 1 minute. The eluate was collected in the collection tube. The beads were discarded. To the collection tube, 200 µl of Oxford Nanopore Technologies extraction elution buffer (EEB) was added and the total volume of 760 µl of eluant was transferred to a fresh 1.5 ml Lo-Bind Eppendorf tube. The reaction was incubated at 56°C for 10 min. The final eluate of UHMW DNA was mixed by slow pipetting five times using a 1ml wide-bore pipette tip and stored overnight at room temperature.

#### **c. DNA Tagmentation**

In a 1.5 ml Lo-Bind Eppendorf tube, 5 µl of ONT ULK fragmentation mix (FRA) and 245 µl of FRA dilution buffer (FDB) were mixed by pipetting. 250 µl of the diluted fragmentation mix was added to 760 µl of UHMW DNA. The reaction was immediately mixed by slow pipetting ten times using a 1 ml wide-bore pipette tip. The reaction was incubated at room temperature for 10 min, followed by incubation on a thermomixer at 75°C for 10 min, and finally cooled on ice for 15 min.

#### **d. Adapter attachment**

5ul of rapid adapter (RA) was added to the DNA reaction and gently mixed by slow pipetting five times using a 1 ml wide-bore pipette tip. The reaction was incubated at room temperature for 30 min.

#### **e. Clean-up**

A metal precipitation star (PS) was added to the adapted DNA for clean-up. 500 µl of precipitation buffer (PTB) was added to the reaction and mixed by rotating on a Hula mixer for 20 min at 3 rpm. The adapted ultra-long DNA was precipitated around the precipitation star and the supernatant was discarded. The tube was briefly spun to remove any remaining supernatant. 300 µl of elution buffer (EB) was added to the tube containing the metal star and DNA. The tube was stored overnight at room temperature. Using a 1ml wide-bore pipette tip the ultra-long DNA library was removed and retained in a fresh 1.5 ml Lo-Bind Eppendorf tube. The tube containing the precipitation star was briefly spun and any remaining eluate was transferred to the tube containing the final ultra-long DNA library. The final library was gently mixed by slow pipetting five times using a 1 ml wide-bore pipette tip.



#### f. Flow cell loading and sequencing

ONT sequencing buffer (SQB) (100 µl) and ONT loading solution (10 µl) were added to 90 µl of the ultra-long DNA library from above. The mixture was gently mixed by slow pipetting five times using a wide-bore pipette tip. Libraries were then incubated at room temperature for 30 min. Next, the libraries were gently mixed by slow pipetting with a wide-bore tip to ensure homogeneity. Before loading the library, the flow cell was primed with flush buffer/flush tether mixture per ONT directions. The library was then added to the flow cell. The mixture was viscous and loaded in a drop-wise manner using a 1 ml wide-bore tip. The sequencing run had a pore scan time set for every 1.5h and a minimum read length set to 1000 bp. Live base calling using the high accuracy (HAC) basecalling model with modified base detection for 5mC was performed on MinKNOW.

#### 4. *de novo* genome assembly

High-quality *de novo* assemblies were generated for each sample using a hybrid assembly approach, combining PacBio HiFi and ONT ultralong reads. For each of the samples we ran HiFiAdapterFilt on the ubams to clean up any reads with adapters still attached. The resulting fastq files were combined into one file per sample using the zcat utility. We also combined all of the ultra-long DNA sequencing kit (ULK) reads (in fastq format) into one fastq file before using it along with the HiFi reads to build assemblies. Further, Hifiasm v0.19.5-r593 (ref.<sup>1</sup>) was used with the following arguments --ul APR029.ul.fastq and APR029.hifi.fastq.

For the trio, Verkko and Hifiasm was run to produce completely phased assemblies. To run Verkko, kmer databases were built using Meryl with the following command using the paternal HiFi reads

```
meryl count compress k=30 threads=XX memory=YY maternal.*fastq.gz output  
maternal_compress.k30.meryl  
meryl count compress k=30 threads=XX memory=YY paternal.*fastq.gz output  
paternal_compress.k30.meryl  
$MERQUERY/trio/hapmers.sh maternal_compress.k30.meryl paternal_compress.k30.meryl
```

Verkko pipeline was run using the following command:

```
verkko -d asm --hifi son.hifi.fastq --nano son.ul.fastq --hap-kmers  
maternal_compress.k30.hapmer.meryl paternal_compress.k30.hapmer.meryl trio
```

To run Hifiasm, parental kmer databases were built using the following commands:

```
yak count -k31 -b37 -t16 -o pat.yak paternal.fq.gz  
yak count -k31 -b37 -t16 -o mat.yak maternal.fq.gz
```

Hifiasm pipeline was run using the following sample command

```
hifiasm -o apr_son.asm -t 32 -1 pat.yak -2 mat.yak --ul son.ul.fastq son.hifi.fastq
```

## 5. Genome assembly polishing

Genome assemblies were screened for contaminant sequences and polished to remove artifacts prior to analysis. Kraken was used to taxonomically classify assembled contigs. The following sample command was used to first classify each contig:

```
kraken2 --memory-mapping --unclassified-out APR043.1.unclassified.fastq --classified-out  
APR043.1.classified.fastq --output APR043.1.out.bed --threads 32 --db kraken_db  
APR043.bp.hap1.p_ctg.fa
```

Once the classification was completed only the contigs that were classified as taxid 9606 were retained.

Mitochondrial read pairs were identified by mapping chrM to the contigs using minimap2 v2.26 using the following example command:

```
minimap2 -a -t 10 APR027.2.classified.fasta chrM.hg38.fasta.
```

Contigs that chrM mapped to were removed from the assemblies.

## 6. Assembly quality assessment

QUAST v5.2.0 (ref.<sup>2</sup>) was run with the following command: `quast.py -o APR043.chm13v2.0 -r chm13v2.0.fa -t 16 APR043.bp.hap1.p_ctg.fa APR043.bp.hap2.p_ctg.fa --large -e`

Quast was, however, not used to assess the correctness of the assemblies as it has been known to mischaracterize SV's as misassemblies. The yak suite v0.1-r66 of tools<sup>1</sup>, including yak count and yak qv, were employed for genome quality validation.

```
yak count -t16 -b37 -o APR043.pb.yak APR043.pb.fastq.gz was first used to build kmer database  
and yak qv was used to calculate the QV score with the following parameters -t32 -p -K 3.2g -l  
100k APR043.pb.yak APR043.bp.hap1.p_ctg.fa > APR043.hap1.pb.yak.qv.txt
```

Mapping rate was assessed using minimap2 v2.26 by mapping the HiFi reads to the assemblies. Potential misjoins in the assembly were identified using the minigraph and paftools.js. The specific commands initiated were -cxasm chm13v2.0.fa APR043.bp.hap1.p\_ctg.fa and paftools misjoin -e APR043.1.misjoins.paf, respectively.

## 7. Evaluation of short read and long read whole genome mapping to APR graph

We used 21 WGS data from Arab descent<sup>3</sup> to quantify the mappability accuracy of short read sequences into APR pangenome and CHM13 reference. To calculate the mapping rate of short reads, we first aligned the paired end reads to CHM13v2 using bwa-mem and to APR graph reference using vg Giraffe. The following commands were used:

```
bwa mem -K 100000000 -Y -R  
'@RG\tID:APPG7555863\tLB:APPG7555863\tPL:ILLUMINA\tPM:HISEQ\tSM:APPG755586  
3' Filtered-APPG7555863_R1.fastq Filtered-APPG7555863_R2.fastq -t 64 > APPG7555863.sam
```

```
vg giraffe -p -t 48 -Z apr-v2.1-mc-chm13.gbz -d apr-v2.1-mc-chm13.dist -m apr-v2.1-mc-  
chm13.min -x /apr-v1.1-mc-chm38-without-hap.xg -f Filtered-APPG7555866_R1.fastq -f  
Filtered-APPG7555866_R2.fastq > APPG7555866.gam
```

We then used the samtools flagstat and vg stats on the resulting bam and gam files to produce stats for the properly paired reads for linear and graph references respectively. The following are examples of commands used:

```
samtools view -@ 64 -bS APPG7555866.sam | samtools flagstat -@ 64 - >  
APPG7555866_Flagstat.txt
```

```
vg stats -p 32 -a APPG7555866.gam
```

## Supplementary Figures

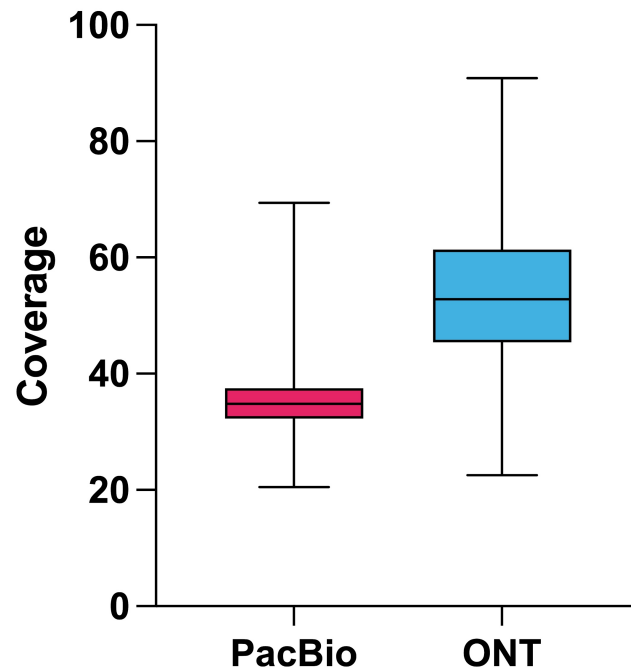

**Supplementary Figure 1: APR long read sequencing coverage.**

The y-axis represents the genome coverage for the entire data. The neon pink box represents data from PacBio high fidelity reads and the teal blue box represents ONT ultra long reads.

**a.**

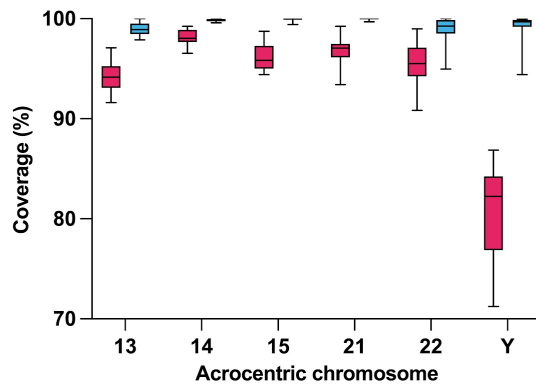

**b.**

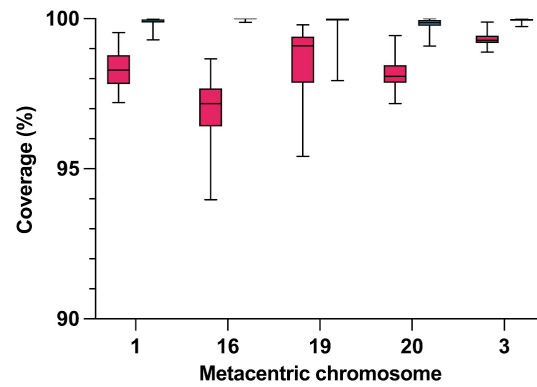

**c.**

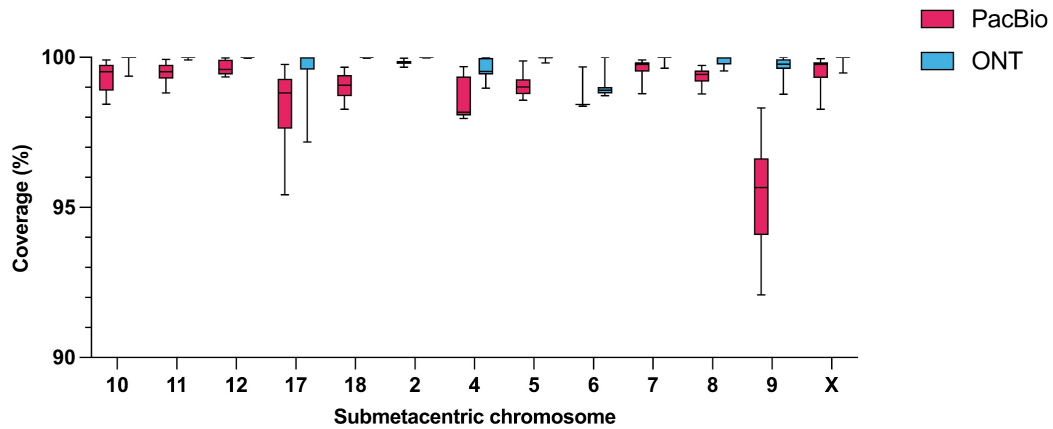

### Supplementary Figure 2: Coverage of chromosomes from APR cohort.

Sample wise alignment to CHM13 across each chromosome comparing Hifi (red) and ONT (blue) reads. The box plot represents the distribution of coverage from all samples for **a.** acrocentric, **b.** metacentric and **c.** submetacentric chromosomes. Note the different Y-axis scales in acrocentric chromosomes.

a.

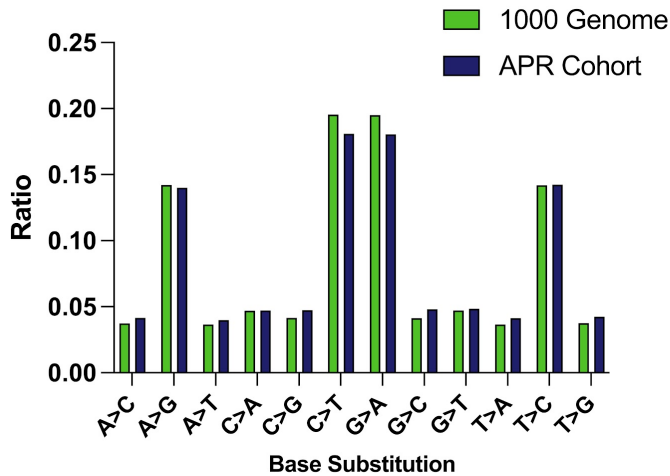

b.

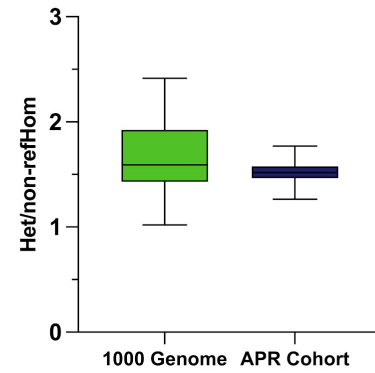

c.

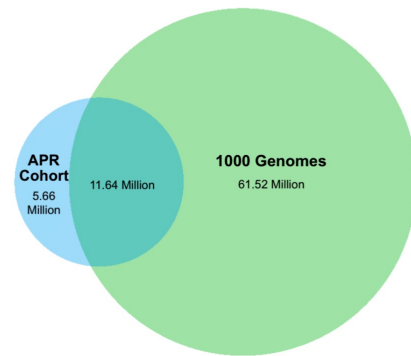

**Supplementary Figure 3: APR SNV variant distribution from HiFi data in comparison with 1000 genomes.**

**a.** The transition to transversion substitution ratio (y-axis) base between (x-axis) APR cohort and 1000G high coverage dataset<sup>4</sup>. **b.** The box plot distribution of het/non reference homozygous distribution between the two color coded cohorts. **c.** The venn diagram depicts the overlapped and unique variants from APR cohort (blue circle) and 1000 genomes (green circle). The size of the circles are proportional to the number of variants.

**a.**

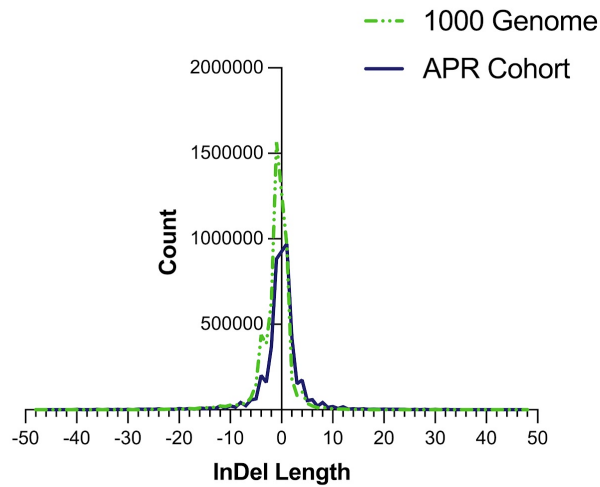

**b.**

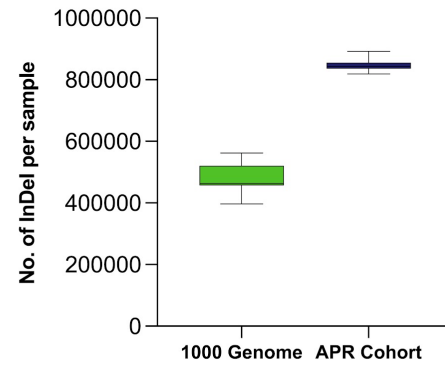

**c.**

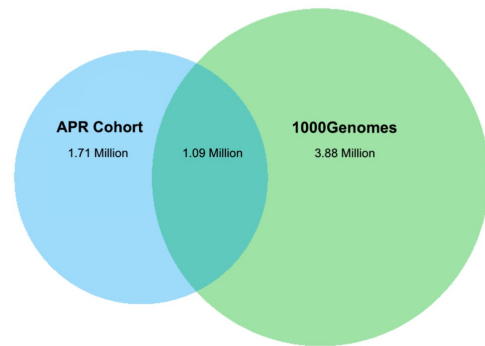

**Supplementary Figure 4: Indel comparison with 1000 genomes.**

**a.** The indel length (x-axis) and count (y-axis) distribution from APR (blue) and 1000 genome cohorts (green line) that has no whole genome data from Middle Eastern population. **b.** Total number of indel distribution, and **c.** the venn diagram depicting the overlapped and unique indels from two color (blue and green) coded cohorts. The size of the circles are proportional to the number of variants.

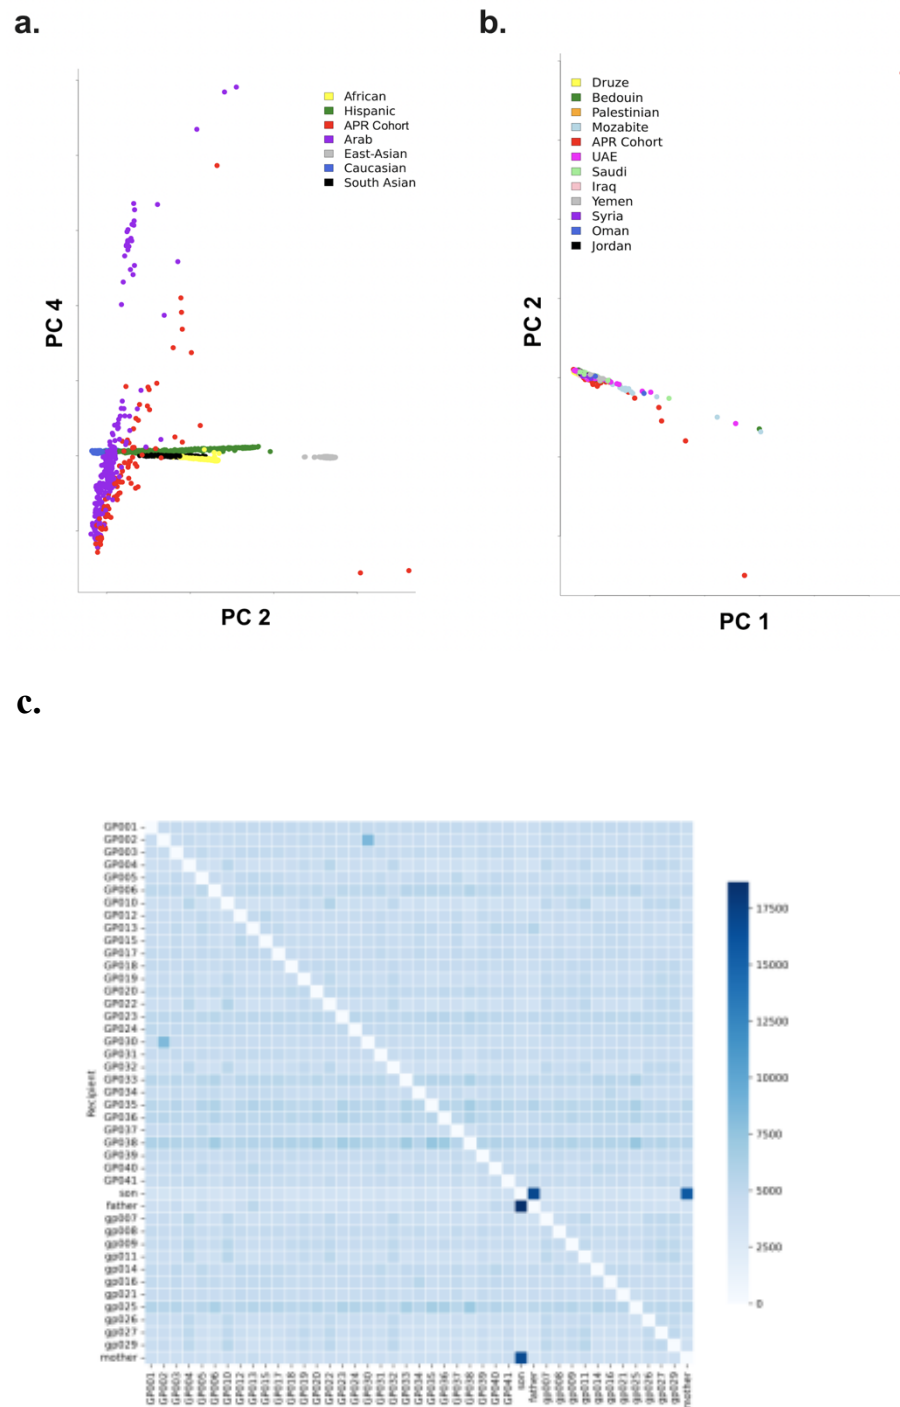

**Supplementary Figure 5: Principal Component Analysis scatter plot.**

Each dot, representing a sample, is color-coded to signify its association with APR cohort, Arab, or the 1000 Genomes Project. **a**, The rotated view indicate the variance captured by principal components (PC2) and 2 (PC4) of APR cohort alignment with global ethnicities. **b**, Scatter plot emphasizing the first PCA component clustering for APR cohort and other Arab ethnicities. The distribution is plotted using PC2 on the y-axis against PC1 on the x-axis. **c**, The matrix shows relatedness between APR samples and the trio (dark blue square) from fineSTRUCTURE haplotype sharing information.



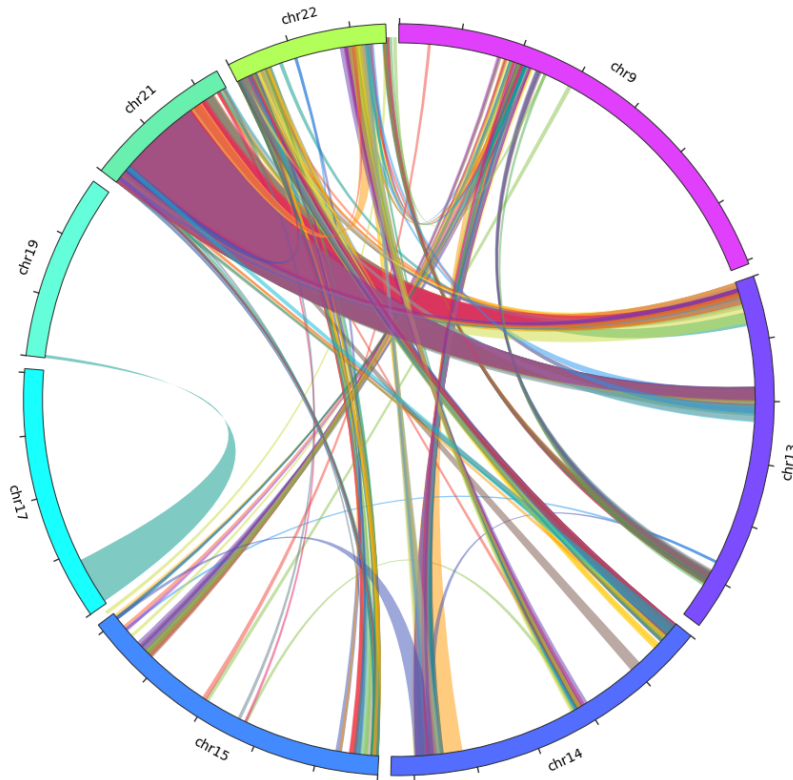

**Supplementary Figure 6: Visualization of interchromosomal misjoins in APR assemblies.**

The circular plot represents different chromosomes labeled as 'chr' followed by their respective numbers. Each connecting line signifies an interchromosomal misjoin, with the width of the line corresponding to the length of the misjoin. The most prominent misjoin, observed between chr21 and chr13, is also found in the HPRC dataset.

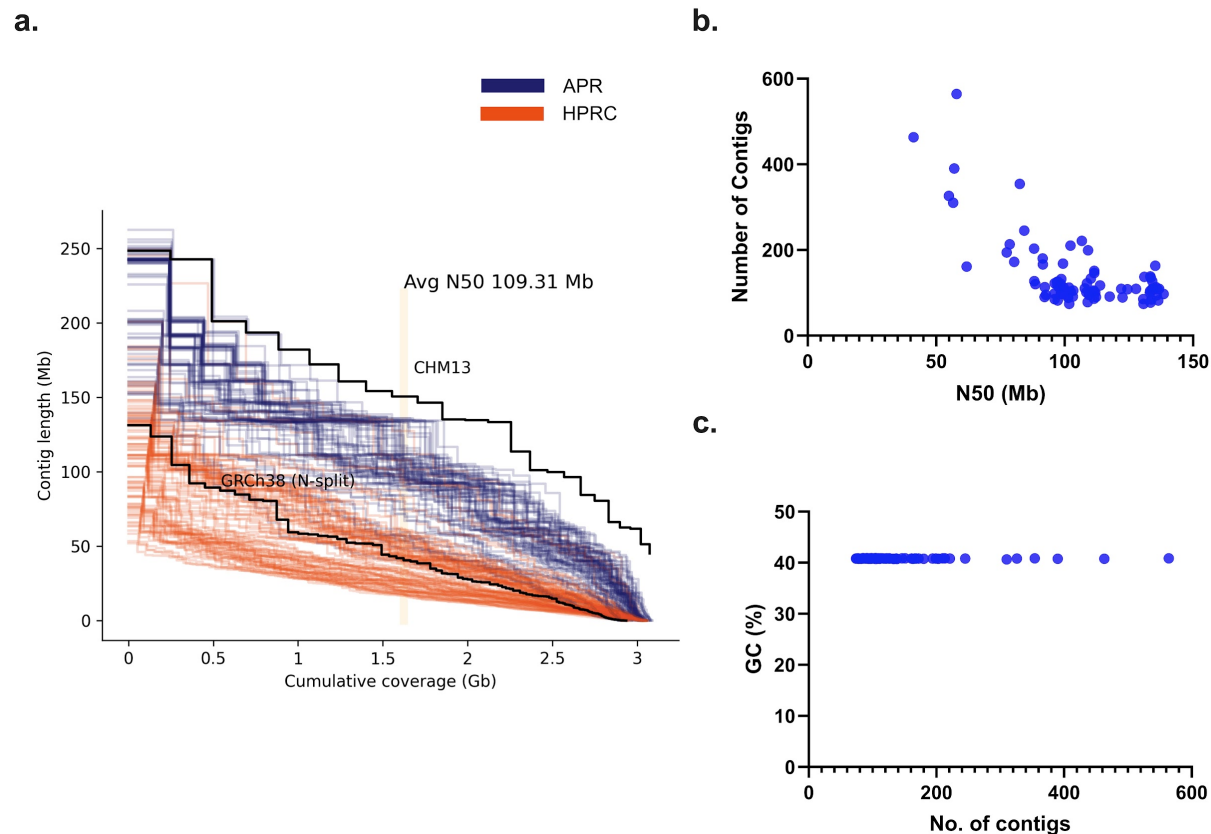

### Supplementary Figure 7: Contig length distribution.

**a**, The contig length (y-axis) and cumulative coverage (x-axis) comparison between HPRC (orange lines) and APR (blue lines). **b**, The total number of contigs (y-axis) and their corresponding N50 length per sample (blue circles). **c**, The GC content (y-axis) for each sample and the contig numbers (x-axis) per sample.

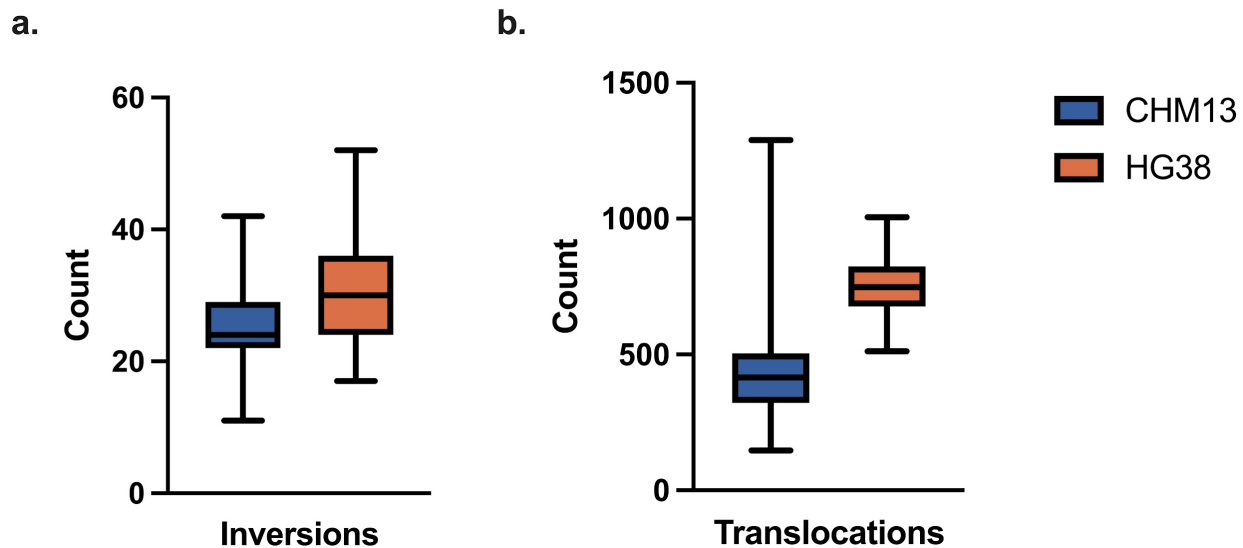

**Supplementary Figure 8: Distribution of misassembled contigs identified as inversions and translocations.**

**a.** Number of inversions detected with reference to CHM13 and GRCh38. **b.** Number of translocations detected with reference to CHM13 and GRCh38.

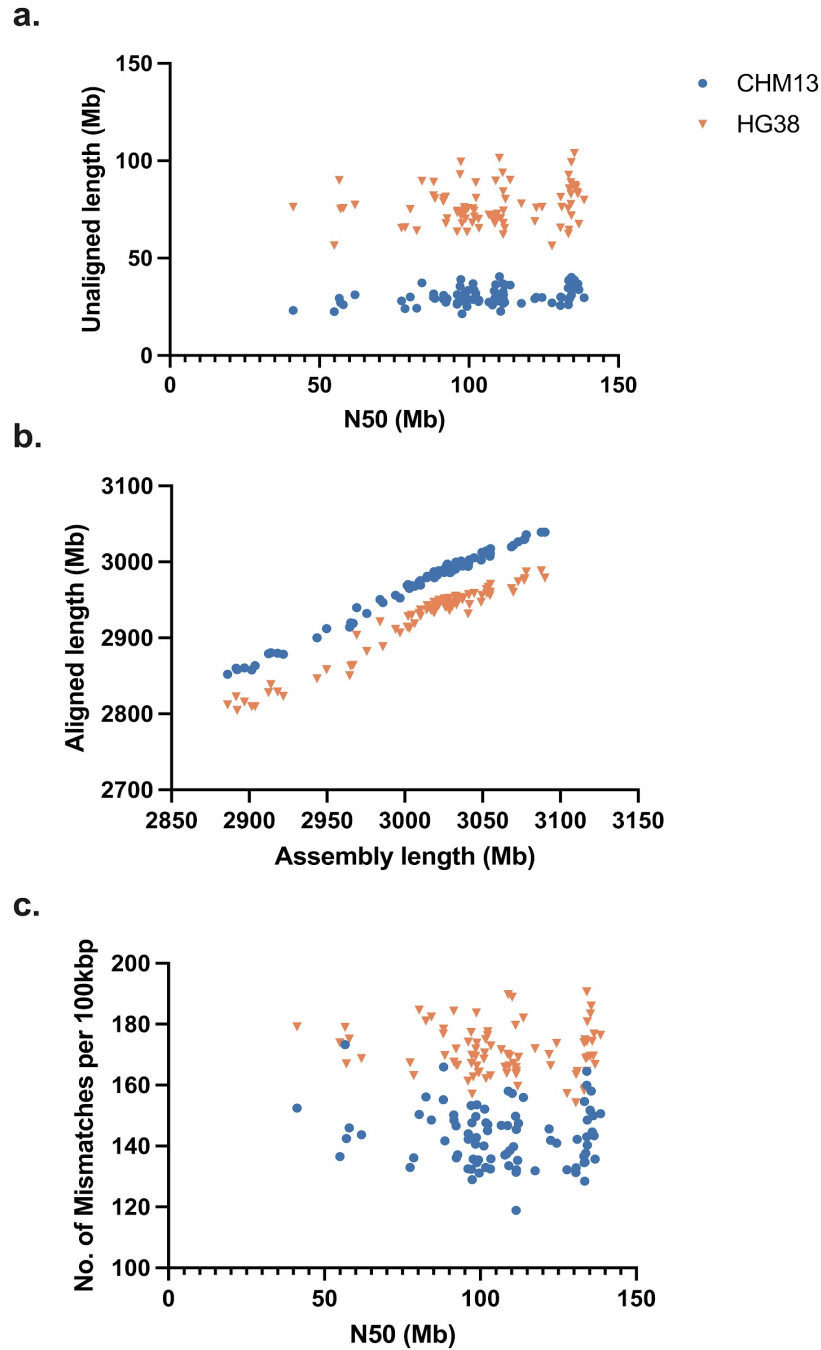

### Supplementary Figure 9: Aligned and unaligned contigs.

The data points depicted in triangles represent hg38 and blue circles represent CHM13 genome reference. **a**, The x- and y-axis refer to unaligned contig length in mega bases (Mb) and their contig N50 length, respectively, for two references. **b**, The aligned bases (y-axis) and the assembly length (x-axis) for each APR sample. **c**, The mismatch in every 100,000 bases (y-axis) and the contig length (x-axis).

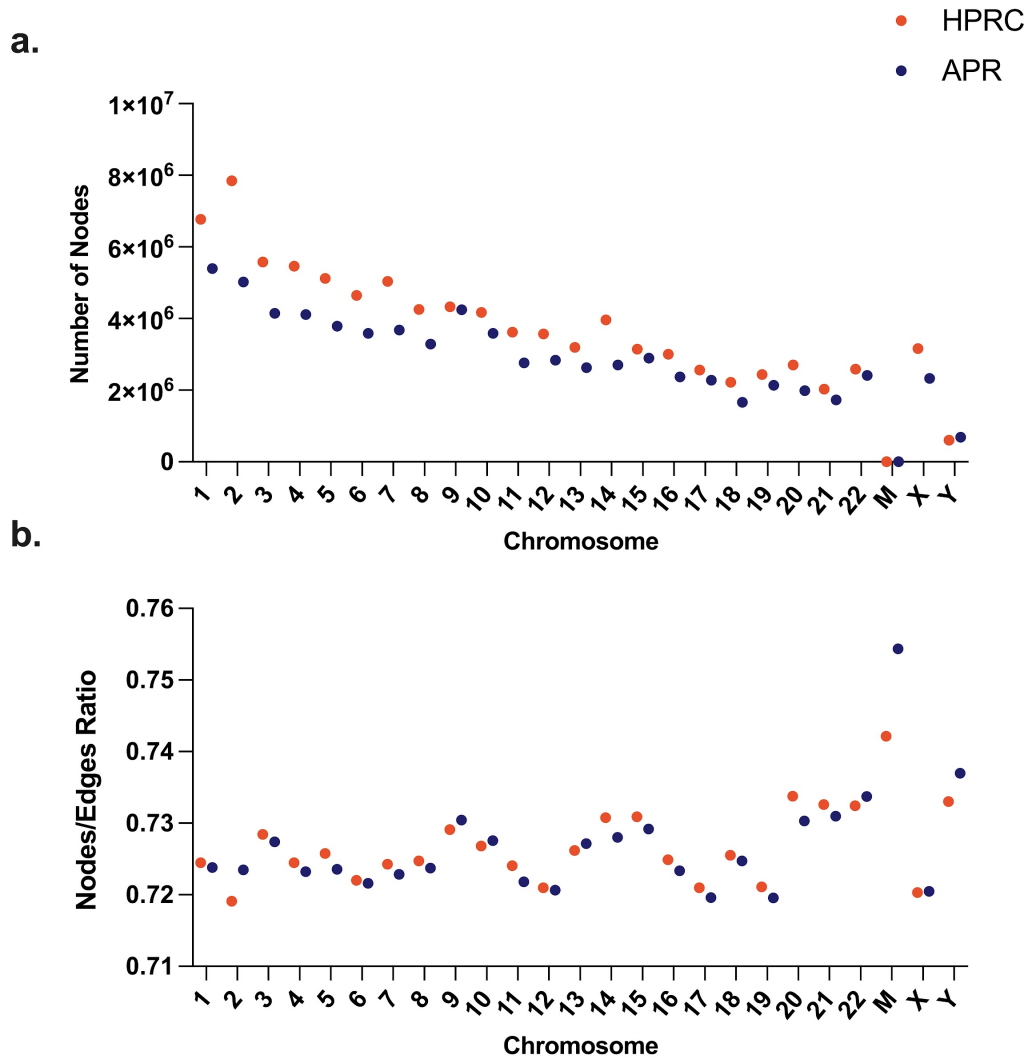

**Supplementary Figure 10: Pangenome graph characteristics.**

**a.** Each dot represents the number of nodes per chromosome. The blue and orange dot represents HPRC and APR pangenome graph node numbers, respectively. **b.** The Node/edge ratio comparison of to HPRC and APR pangenome for each chromosome.

**a.**

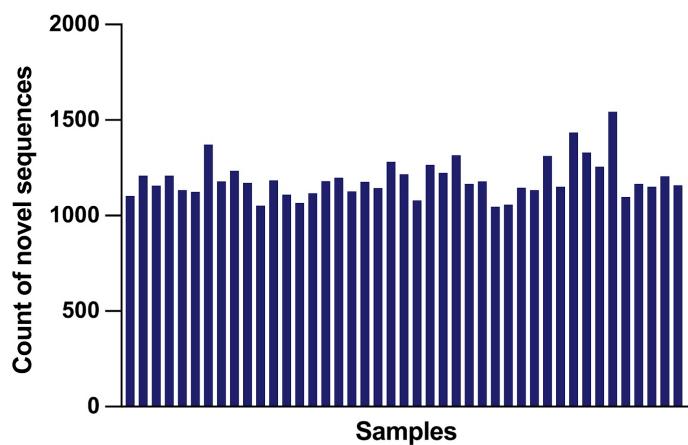

**b.**

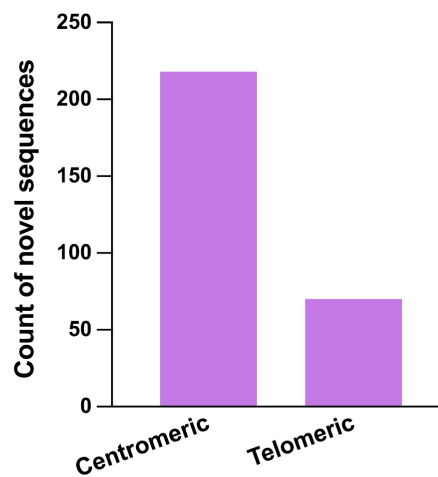

**Supplementary Figure 11: Novel sequences with respect to T2T-CHM13 identified in the APR assemblies.**

**a,** Bar graph indicating the count of newly discovered sequences for every sample, demonstrating the abundance of such sequences in the samples. **b,** Bar graph indicating counts of novel sequences across centromeric and telomeric regions.

**a.**

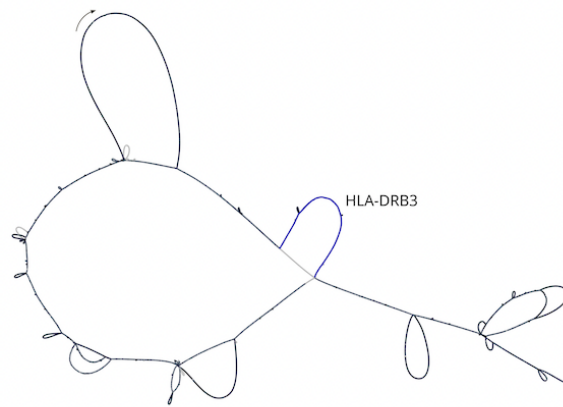

**b.**

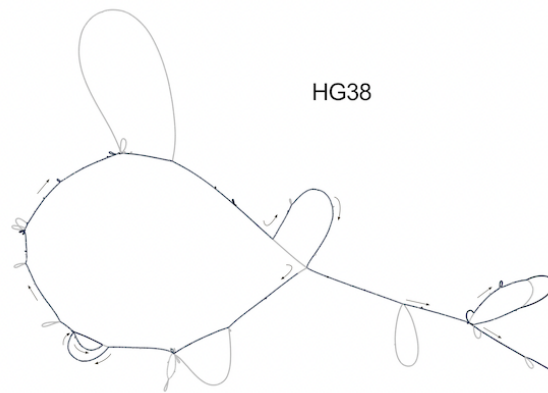

**c.**

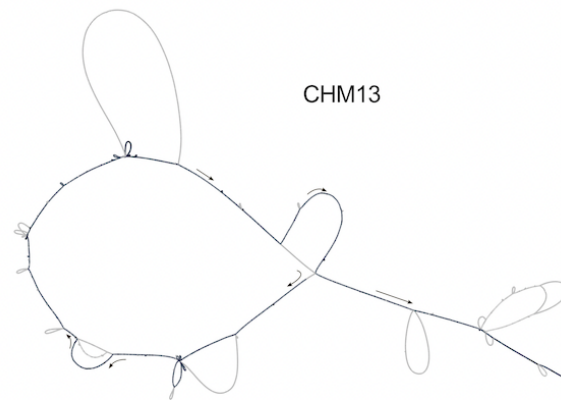

**d.**

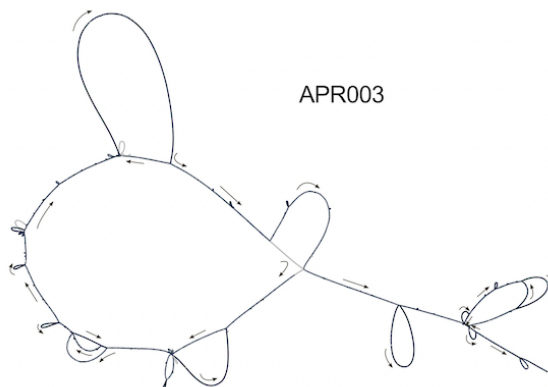

### Supplementary Figure 12: Visualizing complex pangenome loci.

HLA region encompassing HLA-DRB3 gene showing highly varying paths taken by APR sample which is absent in references (HG38 and CHM13).

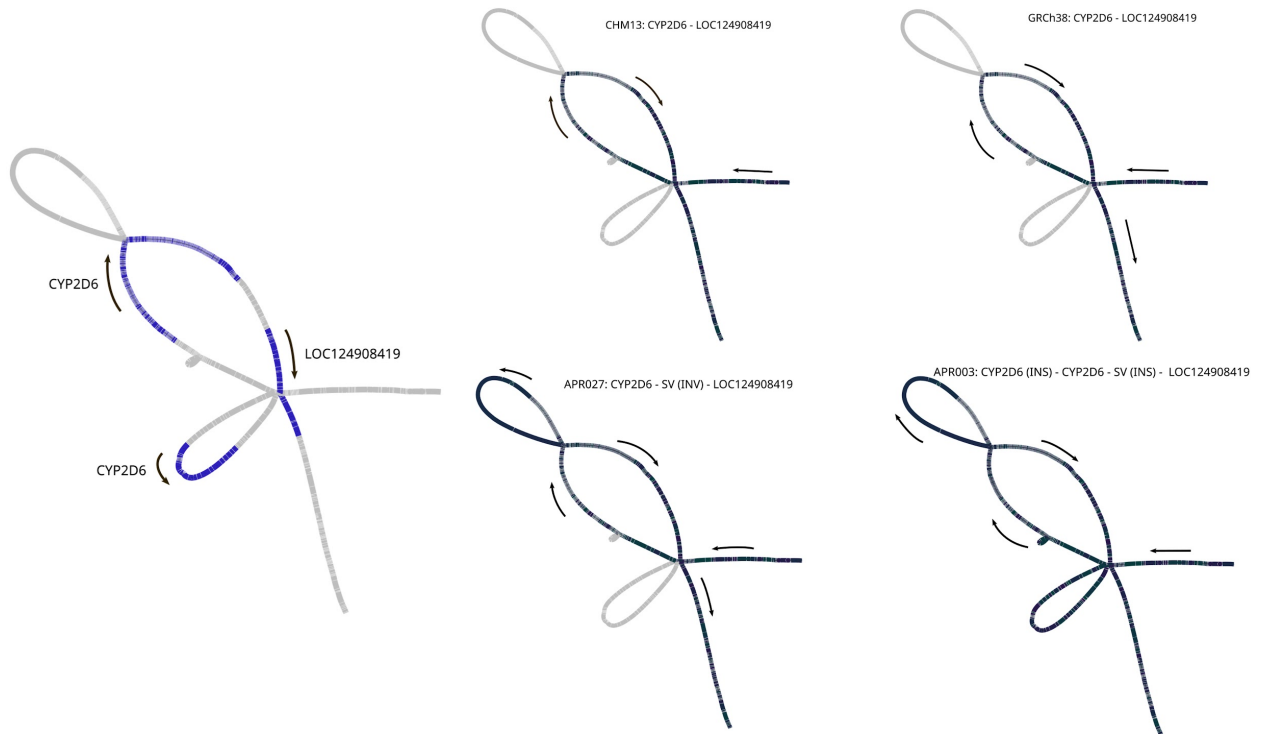

### Supplementary Figure 13: Visualizing complex pangenome loci.

CYP2D6 region encompassing SVs showing absence of haplotypes in references, GRCh38 and CHM13. Inversions and insertions within CYP2D6 in APR samples are mentioned.



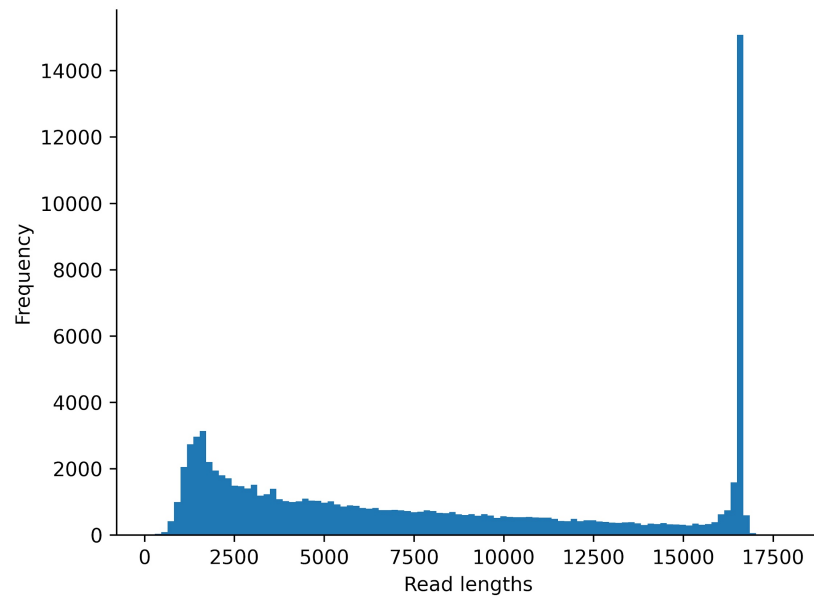

**Supplementary Figure 14: Mitochondrial read distribution.**

Read length (x-axis) distribution of mitochondrial reads (ONT and Hifireads), where y-axis represents read number.

## Supplementary Tables

**Supplementary Table 1 - Phenotypic details of APR samples.**

| Sample ID | Gender | Age | Height (cm) | Weight (kg) | Blood Pressure |
|-----------|--------|-----|-------------|-------------|----------------|
| APR001    | Female | 54  | 162         | 62          | 123/65         |
| APR002    | Female | 54  | 146         | 49          | 139/87         |
| APR003    | Male   | 47  | 187         | 87          | 116/74         |
| APR004    | Female | 51  | 168         | 95          | 130/86         |
| APR005    | Male   | 54  | 177         | 81          | 110/69         |
| APR006    | Male   | 55  | -           | 73.5        | 131/90         |
| APR007    | Female | 57  | 165         | 79          | 124/75         |
| APR008    | Female | 57  | 162         | 74.5        | 123/75         |
| APR009    | Female | 58  | 155         | 57          | 132/83         |
| APR010    | Male   | 59  | 176         | 92          | 122/85         |
| APR011    | Female | 52  | 158         | 93          | 121/74         |
| APR012    | Male   | 53  | 183         | 78          | 113/68         |
| APR013    | Male   | 58  | 176         | 84.3        | 115/67         |
| APR014    | Female | 52  | 154         | 72          | 134/84         |
| APR015    | Female | 70  | 154         | 60          | 100/72         |
| APR016    | Female | 51  | 162         | 79          | 109/67         |
| APR018    | Female | 49  | 162         | 85.9        | 105/69         |
| APR019    | Female | 50  | 161         | 78          | 102/85         |
| APR020    | Female | 54  | 153         | 89          | 112/60         |
| APR021    | Female | 60  | 157         | 72          | 110/75         |
| APR022    | Female | 63  | -           | -           | -              |
| APR023    | Male   | 54  | 165         | 69.4        | 115/76         |
| APR024    | Male   | 42  | -           | -           | 123/74         |
| APR025    | Male   | 29  | 183         | 73          | 117/75         |
| APR026    | Male   | 22  | 171         | 84          | 118/75         |
| APR027    | Female | 33  | 164         | 85          | 100/70         |

|        |        |    |     |      |        |
|--------|--------|----|-----|------|--------|
| APR029 | Female | 60 | 165 | 92   | 100/56 |
| APR030 | Female | 61 | 154 | 80   | 114/69 |
| APR031 | Female | 40 | 147 | 67.2 | 104/67 |
| APR032 | Female | 48 | 163 | 82   | 115/67 |
| APR033 | Male   | 39 | -   | 113  | 129/71 |
| APR034 | Female | 27 | 160 | 82.9 | 119/75 |
| APR035 | Female | 36 | 150 | 56.8 | 113/61 |
| APR036 | Male   | 52 | -   | 104  | 128/71 |
| APR037 | Female | 50 | -   | 71   | 109/70 |
| APR038 | Male   | 20 | 177 | 81.5 | 123/67 |
| APR039 | Male   | 20 | 171 | 77   | 117/77 |
| APR040 | Female | 22 | -   | -    | 115/74 |
| APR041 | Male   | 32 | 177 | 90   | 122/77 |

**Supplementary Table 3 - Sample-wise ultra long read (>100kb) count and coverage.**

| <b>Sample ID</b> | <b>Coverage</b> | <b>Total sequenced bases with greater than 100kb (bp) length</b> |
|------------------|-----------------|------------------------------------------------------------------|
| APR001           | 13.5235435      | 40570630476                                                      |
| APR002           | 17.5960556      | 52788166730                                                      |
| APR003           | 20.7247738      | 62174321299                                                      |
| APR004           | 19.3800634      | 58140190072                                                      |
| APR005           | 18.9823212      | 56946963462                                                      |
| APR006           | 10.4140496      | 31242148874                                                      |
| APR007           | 19.1582528      | 57474758357                                                      |
| APR008           | 15.2495923      | 45748777027                                                      |
| APR009           | 22.655163       | 67965489146                                                      |
| APR010           | 13.112767       | 39338300903                                                      |
| APR011           | 18.7574225      | 56272267470                                                      |
| APR012           | 13.6684289      | 41005286553                                                      |
| APR013           | 15.5452517      | 46635755104                                                      |
| APR014           | 12.9466975      | 38840092357                                                      |
| APR015           | 19.2821444      | 57846433278                                                      |
| APR016           | 14.0907649      | 42272294655                                                      |
| APR017           | 3.45649985      | 10369499554                                                      |
| APR018           | 13.7969021      | 41390706346                                                      |
| APR019           | 13.873482       | 41620445880                                                      |
| APR020           | 12.8439449      | 38531834769                                                      |
| APR021           | 14.8527837      | 44558350970                                                      |
| APR022           | 11.9297603      | 35789281042                                                      |

|        |            |             |
|--------|------------|-------------|
| APR023 | 22.0962993 | 66288897930 |
| APR024 | 13.7655261 | 41296578258 |
| APR025 | 16.751073  | 50253219117 |
| APR026 | 18.9713638 | 56914091460 |
| APR027 | 12.7115674 | 38134702289 |
| APR029 | 12.3809919 | 37142975789 |
| APR030 | 6.35730861 | 19071925836 |
| APR031 | 11.9854624 | 35956387064 |
| APR032 | 5.99528527 | 17985855812 |
| APR033 | 5.63591098 | 16907732932 |
| APR034 | 9.7725032  | 29317509592 |
| APR035 | 10.2176266 | 30652879897 |
| APR036 | 6.94947899 | 20848436972 |
| APR037 | 11.627317  | 34881950914 |
| APR038 | 6.43130418 | 19293912528 |
| APR039 | 7.30018519 | 21900555565 |
| APR040 | 5.7482963  | 17244888893 |
| APR041 | 8.32129083 | 24963872482 |
| APR-F  | 14.4466994 | 43340098317 |
| APR-M  | 14.4447902 | 43334370646 |
| APR-S  | 11.80888   | 35426639991 |

**Supplementary Table 7 - Contiguity of Verkko and Hifiasm assemblies.**

| N50 (Mb) | Verkko - sample | Verkko - sample trio |        | Hifiasm - sample |       | Hifiasm - sample trio |        |
|----------|-----------------|----------------------|--------|------------------|-------|-----------------------|--------|
|          |                 | hap1                 | hap2   | hap1             | hap2  | hap1                  | hap2   |
| APR-S    | 9.16            | 142.81               | 149.22 | -                | -     | 135.26                | 107.84 |
| APR-M    | 3.02            | -                    | -      | 111.54           | 97.72 | -                     | -      |
| APR-F    | 9.52            | -                    | -      | 102.31           | 88.08 | -                     | -      |

**Supplementary Table 8 - Mitochondrial contigs obtained for each sample by mapping to chrM.**

| Sample ID | Haplotype | Contig ID   | Aligned length | Contig length | Percentage alignment |
|-----------|-----------|-------------|----------------|---------------|----------------------|
| APR-F     | 1         | h1tg000180l | 16135          | 17071         | 0.945170172          |
| APR-F     | 2         | h2tg000123c | 9751           | 16570         | 0.588473144          |
| APR-M     | 2         | h2tg000085l | 16568          | 32061         | 0.516764917          |
| APR-M     | 1         | h1tg000107l | 16568          | 32061         | 0.516764917          |
| APR-S     | 2         | h2tg000079c | 16344          | 16570         | 0.986360893          |
| APR-S     | 1         | h1tg000111c | 16344          | 16570         | 0.986360893          |
| APR001    | 1         | h1tg000072c | 16569          | 33138         | 0.5                  |
| APR001    | 2         | h2tg000064c | 16569          | 33138         | 0.5                  |
| APR002    | 1         | h1tg000068l | 16569          | 98424         | 0.168343087          |
| APR002    | 2         | h2tg000062l | 16569          | 81858         | 0.202411493          |
| APR003    | 1         | h1tg000080l | 16566          | 32490         | 0.509879963          |
| APR003    | 2         | h2tg000067l | 16566          | 32490         | 0.509879963          |
| APR004    | 1         | h1tg000057l | 16569          | 46115         | 0.359297409          |

|        |   |             |       |       |             |
|--------|---|-------------|-------|-------|-------------|
| APR004 | 2 | h2tg000069l | 16569 | 31650 | 0.523507109 |
| APR005 | 1 | h1tg000042c | 16569 | 49710 | 0.333313217 |
| APR005 | 2 | h2tg000079c | 15985 | 16570 | 0.964695232 |
| APR006 | 1 | h1tg000088l | 16569 | 49502 | 0.334713749 |
| APR006 | 2 | h2tg000086l | 16569 | 49502 | 0.334713749 |
| APR007 | 2 | h2tg000056l | 16569 | 32867 | 0.504122676 |
| APR007 | 1 | h1tg000050l | 16569 | 32867 | 0.504122676 |
| APR008 | 1 | h1tg000060l | 16569 | 49209 | 0.3367067   |
| APR008 | 2 | h2tg000069l | 16569 | 49209 | 0.3367067   |
| APR009 | 1 | h1tg000054l | 16569 | 32938 | 0.503036007 |
| APR009 | 2 | h2tg000064l | 16569 | 32938 | 0.503036007 |
| APR010 | 2 | h2tg000094l | 16569 | 33094 | 0.500664773 |
| APR010 | 1 | h1tg000115l | 16569 | 33094 | 0.500664773 |
| APR011 | 1 | h1tg000063l | 16569 | 32939 | 0.503020735 |
| APR011 | 2 | h2tg000058l | 16569 | 32939 | 0.503020735 |
| APR012 | 1 | h1tg000060l | 16566 | 32299 | 0.512895136 |
| APR012 | 2 | h2tg000064l | 16566 | 32299 | 0.512895136 |
| APR013 | 2 | h2tg000079c | 15468 | 16568 | 0.933606953 |
| APR013 | 1 | h1tg000074c | 15468 | 16568 | 0.933606953 |
| APR014 | 1 | h1tg000051c | 9969  | 16569 | 0.601665761 |
| APR014 | 2 | h2tg000046c | 9969  | 16569 | 0.601665761 |
| APR015 | 2 | h2tg000065c | 9723  | 16578 | 0.586500181 |
| APR015 | 1 | h1tg000072c | 9723  | 16578 | 0.586500181 |
| APR016 | 2 | h2tg000041c | 10338 | 16575 | 0.623710407 |

|        |   |             |       |       |             |
|--------|---|-------------|-------|-------|-------------|
| APR016 | 1 | h1tg000036c | 10338 | 16575 | 0.623710407 |
| APR017 | 2 | h2tg0001411 | 16558 | 40011 | 0.413836195 |
| APR017 | 1 | h1tg0001251 | 16558 | 40011 | 0.413836195 |
| APR018 | 2 | h2tg0000581 | 16569 | 32879 | 0.503938684 |
| APR018 | 1 | h1tg0000551 | 16569 | 32879 | 0.503938684 |
| APR019 | 2 | h2tg000071c | 12783 | 16569 | 0.771500996 |
| APR019 | 1 | h1tg000067c | 12783 | 16569 | 0.771500996 |
| APR020 | 1 | h1tg0000871 | 16569 | 60428 | 0.274194082 |
| APR020 | 2 | h2tg0000891 | 16569 | 45635 | 0.363076586 |
| APR021 | 1 | h1tg000082c | 14412 | 16568 | 0.869869628 |
| APR021 | 2 | h2tg000087c | 14412 | 16568 | 0.869869628 |
| APR022 | 1 | h1tg0000741 | 16569 | 32955 | 0.502776513 |
| APR022 | 2 | h2tg0000911 | 16569 | 32955 | 0.502776513 |
| APR023 | 2 | h2tg0000571 | 16567 | 49436 | 0.335120155 |
| APR023 | 1 | h1tg0000531 | 16567 | 49436 | 0.335120155 |
| APR024 | 2 | h2tg0000471 | 16569 | 38699 | 0.428150598 |
| APR024 | 1 | h1tg0000521 | 16569 | 38699 | 0.428150598 |
| APR025 | 2 | h2tg0000921 | 16567 | 33044 | 0.501361821 |
| APR025 | 1 | h1tg0000871 | 16567 | 33044 | 0.501361821 |
| APR026 | 1 | h1tg000066c | 15910 | 16571 | 0.960111037 |
| APR026 | 2 | h2tg000074c | 15910 | 16571 | 0.960111037 |
| APR027 | 1 | h1tg000067c | 16569 | 33144 | 0.499909486 |
| APR029 | 2 | h2tg0000891 | 16569 | 49485 | 0.334828736 |
| APR029 | 1 | h1tg0000901 | 16569 | 49485 | 0.334828736 |



|        |   |             |       |       |             |
|--------|---|-------------|-------|-------|-------------|
| APR030 | 1 | h1tg000059c | 16569 | 49707 | 0.333333333 |
| APR030 | 2 | h2tg000071c | 12163 | 16569 | 0.734081719 |
| APR031 | 2 | h2tg000088l | 16569 | 32866 | 0.504138015 |
| APR031 | 1 | h1tg000075l | 16569 | 32866 | 0.504138015 |
| APR032 | 1 | h1tg000059l | 16569 | 49192 | 0.336823061 |
| APR032 | 2 | h2tg000056l | 16569 | 49192 | 0.336823061 |
| APR033 | 2 | h2tg000081c | 16569 | 33138 | 0.5         |
| APR033 | 1 | h1tg000074c | 16569 | 33138 | 0.5         |
| APR034 | 2 | h2tg000113l | 16569 | 32457 | 0.510490803 |
| APR034 | 1 | h1tg000094l | 16569 | 32457 | 0.510490803 |
| APR035 | 1 | h1tg000059l | 16567 | 44087 | 0.375779708 |
| APR035 | 2 | h2tg000067l | 16567 | 44087 | 0.375779708 |
| APR036 | 2 | h2tg000229l | 16558 | 30953 | 0.53494007  |
| APR036 | 1 | h1tg000236l | 16558 | 30953 | 0.53494007  |
| APR037 | 2 | h2tg000100l | 16569 | 40629 | 0.407812154 |
| APR037 | 1 | h1tg000069l | 16569 | 40629 | 0.407812154 |
| APR038 | 1 | h1tg000246l | 16564 | 32794 | 0.505092395 |
| APR038 | 2 | h2tg000249l | 16564 | 32794 | 0.505092395 |
| APR039 | 2 | h2tg000123l | 16569 | 32587 | 0.508454292 |
| APR039 | 1 | h1tg000143l | 16569 | 32587 | 0.508454292 |
| APR040 | 1 | h1tg000123l | 16569 | 32818 | 0.504875373 |
| APR040 | 2 | h2tg000131l | 16569 | 32818 | 0.504875373 |
| APR041 | 2 | h2tg000373c | 16569 | 33140 | 0.499969825 |
| APR041 | 1 | h1tg000400c | 16569 | 33140 | 0.499969825 |

**Supplementary Table 15: Pan ethnic disease autosomal recessive of X-linked genes within APR specific duplicated genes.**

| <b>Gene</b> | <b>Career Screening</b>                                                                                            |
|-------------|--------------------------------------------------------------------------------------------------------------------|
| CASQ2       | Catecholaminergic polymorphic ventricular tachycardia (CASQ2-related); Autosomal Recessive; CASQ2                  |
| DNAI1       | Primary ciliary dyskinesia (DNAI1-related); Autosomal Recessive; DNAI1                                             |
| EXOSC3      | Pontocerebellar hypoplasia type 1B; Autosomal Recessive; EXOSC3                                                    |
| FANCG       | Fanconi anemia type G; Autosomal Recessive; FANCG                                                                  |
| GALT        | Galactosemia (GALT-related); Autosomal Recessive; GALT                                                             |
| GAMT        | Guanidinoacetate methyltransferase deficiency; Autosomal Recessive; GAMT                                           |
| GRHPR       | Primary hyperoxaluria type 2; Autosomal Recessive; GRHPR                                                           |
| HSD3B2      | Congenital adrenal hyperplasia due to 3-beta- hydroxysteroid dehydrogenase deficiency; Autosomal Recessive; HSD3B2 |
| LAMA3       | LAMA3-related conditions; Autosomal Recessive; LAMA3                                                               |
| LPL         | Familial chylomicronemia syndrome; Autosomal Recessive; LPL                                                        |
| NDUFS7      | Mitochondrial complex I deficiency 3; Autosomal Recessive; NDUFS7                                                  |
| NPC1        | Niemann-Pick disease type C (NPC1-related); Autosomal Recessive; NPC1                                              |
| OCA2        | Oculocutaneous albinism type 2; Autosomal Recessive; OCA2                                                          |
| PDHA1       | Pyruvate dehydrogenase complex deficiency (PDHA1-related); X-Linked; PDHA1                                         |
| PHGDH       | Phosphoglycerate dehydrogenase deficiency; Autosomal Recessive; PHGDH                                              |
| PHKG2       | Glycogen storage disease type IXc; Autosomal Recessive; PHKG2                                                      |
| SLC25A15    | Hyperornithinemia-hyperammonemia-homocitrullinuria syndrome; Autosomal Recessive; SLC25A15                         |
| ST3GAL5     | GM3 synthase deficiency; Autosomal Recessive; ST3GAL5                                                              |

**Supplementary Table 17. Comparison on size of APR HPRC graph reference and HPRC, CPC and APR graph reference.**

| <b>Genome</b> | <b>No. of Nodes</b> | <b>No. of Edges</b> | <b>Complexity</b> | <b>Length (bp)</b> |
|---------------|---------------------|---------------------|-------------------|--------------------|
| APR           | 72,256,745          | 99,652,737          | 1.3761            | 3,307,861,124      |
| HPRC          | 92,019,585          | 126,863,170         | 1.3760            | 3,328,787,872      |
| CPC           | 64,474,746          | 89,583,031          | 1.389             | 3,284,609,818      |

\*Complexity=Ratio of Edges to Nodes

**Supplementary Table 23. Repeat elements within APR specific novel sequences.**

| <b>Repeat Elements</b> | <b>Number of Elements</b> | <b>Length</b> | <b>Percentage</b> |
|------------------------|---------------------------|---------------|-------------------|
| ALUs (SINE)            | 21886                     | 4958828       | 4.91              |
| MIRs (SINE)            | 3416                      | 474855        | 0.47              |
| LINE1                  | 8633                      | 5465252       | 5.41              |
| LINE2                  | 2474                      | 576783        | 0.57              |
| L3/CR1 (LINE)          | 206                       | 50497         | 0.05              |
| ERV1 (LTR)             | 1513                      | 687192        | 0.68              |
| ERV1-MaLRs (LTR)       | 3211                      | 1431290       | 1.42              |
| ERV_classI (LTR)       | 2279                      | 1930489       | 1.91              |
| ERV_classII (LTR)      | 237                       | 323743        | 0.32              |
| hAT-Charlie (DNA)      | 2116                      | 438494        | 0.43              |
| TcMar-Tigger (DNA)     | 845                       | 242894        | 0.24              |
| Unclassified           | 21979                     | 5509762       | 5.46              |
| Interspersed           |                           | 22329369      | 22.12             |
| Small RNA              | 612                       | 59617         | 0.06              |
| Satellites:            | 7995                      | 32022812      | 31.73             |
| Simple Repeats         | 20407                     | 22529584      | 22.32             |
| Low Complexity         | 1849                      | 494198        | 0.49              |

**Supplementary Table 28 - Structural haplotypes present in APR, HPRC+CPC**

| Region      | Haplotype (Genic)                                                  | APR Count | APR Sample ID                                                                                                                                                                                                                                                                                                                                   | HPRC-CPC Count |
|-------------|--------------------------------------------------------------------|-----------|-------------------------------------------------------------------------------------------------------------------------------------------------------------------------------------------------------------------------------------------------------------------------------------------------------------------------------------------------|----------------|
| <b>chr1</b> | PRAMEF19(1)-PRAMEF14(1)-<br>PRAMEF15(1)-PRAMEF8(1)-<br>PRAMEF33(1) | 38        | APR-F<br>APR001<br>APR002<br>APR003<br>APR004<br>APR005<br>APR006<br>APR007<br>APR008<br>APR010<br>APR011<br>APR012<br>APR013<br>APR014<br>APR015<br>APR016<br>APR017<br>APR018<br>APR019<br>APR020<br>APR022<br>APR024<br>APR026<br>APR027<br>APR029<br>APR030<br>APR032<br>APR033<br>APR034<br>APR035<br>APR036<br>APR037<br>APR038<br>APR039 | 105            |

|             |                                                                    |    |                                                                                                                                                                                                                                                                                     |   |
|-------------|--------------------------------------------------------------------|----|-------------------------------------------------------------------------------------------------------------------------------------------------------------------------------------------------------------------------------------------------------------------------------------|---|
|             |                                                                    |    | APR040<br>APR041<br>APR-M<br>APR-S                                                                                                                                                                                                                                                  |   |
|             | PRAMEF19(1)-PRAMEF14(1)-<br>PRAMEF15(2)-PRAMEF8(1)-<br>PRAMEF33(1) | 4  | APR009<br>APR023<br>APR025<br>APR031                                                                                                                                                                                                                                                | 0 |
|             | PRAMEF19(1)-PRAMEF14(2)-<br>PRAMEF15(2)-PRAMEF8(1)-<br>PRAMEF33(1) | 1  | APR021                                                                                                                                                                                                                                                                              | 0 |
| <b>chrX</b> | CT45A3-CT45A7-CT45A2-CT45A9                                        | 31 | APR-F<br>APR002<br>APR004<br>APR005<br>APR008<br>APR009<br>APR010<br>APR011<br>APR012<br>APR013<br>APR016<br>APR017<br>APR018<br>APR020<br>APR021<br>APR022<br>APR023<br>APR026<br>APR027<br>APR029<br>APR030<br>APR032<br>APR034<br>APR035<br>APR036<br>APR037<br>APR038<br>APR039 | 0 |

|  |                      |    |                                                                                                                      |    |
|--|----------------------|----|----------------------------------------------------------------------------------------------------------------------|----|
|  |                      |    | APR040<br>APR-M<br>APR-S                                                                                             |    |
|  | CT45A3-CT45A7-CT45A2 | 12 | APR001<br>APR003<br>APR006<br>APR007<br>APR014<br>APR015<br>APR019<br>APR024<br>APR025<br>APR031<br>APR033<br>APR041 | 0  |
|  | CT45A2-CT45A9-CT45A9 | 0  |                                                                                                                      | 91 |
|  | CT45A9-CT45A9        | 0  |                                                                                                                      | 9  |
|  | CT45A9               | 0  |                                                                                                                      | 4  |

## References

1. Cheng, H., Concepcion, G. T., Feng, X., Zhang, H. & Li, H. Haplotype-resolved de novo assembly using phased assembly graphs with hifiasm. *Nat Methods* **18**, 170–175 (2021).
2. Mikheenko, A., Prjibelski, A., Saveliev, V., Antipov, D. & Gurevich, A. Versatile genome assembly evaluation with QUAST-LG. *Bioinformatics* **34**, i142–i150 (2018).
3. Almarri, M. A. *et al.* The genomic history of the Middle East. *Cell* **184**, 4612–4625.e14 (2021).
4. Byrska-Bishop, M. *et al.* High-coverage whole-genome sequencing of the expanded 1000 Genomes Project cohort including 602 trios. *Cell* **185**, 3426–3440.e19 (2022).
